# Supplementary material for: Doxycycline versus prednisolone as an initial treatment strategy for bullous pemphigoid: a pragmatic, non-inferiority, randomised controlled trial
Source: PubMed Central journal article supplement (PMC5400809; doi:10.1016/s0140-6736(17)30560-3), 2017-04-22
Supplement: mmc1.pdf [file mmc1.pdf]

# THE LANCET

## Supplementary appendix

This appendix formed part of the original submission and has been peer reviewed. We post it as supplied by the authors.

Supplement to: Williams HC, Wojnarowska F, Kirtschig G, et al, on behalf of the UK Dermatology Clinical Trials Network BLISTER Study Group. Doxycycline versus prednisolone as an initial treatment strategy for bullous pemphigoid: a pragmatic, non-inferiority, randomised controlled trial. *Lancet* 2017; published online March 6. [http://dx.doi.org/10.1016/S0140-6736\(17\)30560-3](http://dx.doi.org/10.1016/S0140-6736(17)30560-3).

## SUPPLEMENTARY APPENDIX

**Table 1: Results of UKDCTN survey**

|                                                                                                                                                                                                                                                                                                                                     |
|-------------------------------------------------------------------------------------------------------------------------------------------------------------------------------------------------------------------------------------------------------------------------------------------------------------------------------------|
| <b>Question 1: What reduction in effectiveness would be acceptable?</b>                                                                                                                                                                                                                                                             |
| <b>(a) Assuming the mortality rate with oxytetracycline is 1% less than with prednisolone and prednisolone is 95% effective:</b>                                                                                                                                                                                                    |
| <b>Results:</b>                                                                                                                                                                                                                                                                                                                     |
| <ul style="list-style-type: none"> <li>○ a minimum median effectiveness rate of 50% would be required for oxytetracycline to have <i>any place</i> in the management of BP</li> <li>○ a minimum median effectiveness rate of 80% would be required oxytetracycline to have <i>potential</i> as primary treatment for BP.</li> </ul> |
| <b>(b) Assuming the mortality rate with oxytetracycline is 10% less than with prednisolone and prednisolone is 95% effective:</b>                                                                                                                                                                                                   |
| <b>Results:</b>                                                                                                                                                                                                                                                                                                                     |
| <ul style="list-style-type: none"> <li>○ a minimum median effectiveness rate of 40% would be required for oxytetracycline to have <b>any place</b> in the management of BP</li> <li>○ a minimum median effectiveness rate of 70% would be required oxytetracycline to have <b>potential</b> as primary treatment for BP.</li> </ul> |
| <b>Question 2: What reduction in mortality would be useful?</b>                                                                                                                                                                                                                                                                     |
| <b>(a) Assuming oxytetracycline is 5% less effective than prednisolone and the mortality rate of prednisolone is 40%:</b>                                                                                                                                                                                                           |
| <b>Results:</b>                                                                                                                                                                                                                                                                                                                     |
| <ul style="list-style-type: none"> <li>○ a maximum median mortality rate of 35% would be acceptable for oxytetracycline to have <i>any place</i> in the management of BP</li> <li>○ a maximum median mortality rate of 23% would be acceptable for oxytetracycline to have <i>potential</i> as primary treatment for BP.</li> </ul> |
| <b>(b) Assuming oxytetracycline is 10% less effective than prednisolone and the mortality rate of prednisolone is 40%:</b>                                                                                                                                                                                                          |
| <b>Results:</b>                                                                                                                                                                                                                                                                                                                     |
| <ul style="list-style-type: none"> <li>○ a maximum median mortality rate of 30% would be acceptable for oxytetracycline to have <i>any place</i> in the management of BP</li> <li>○ a maximum median mortality rate of 20% would be acceptable for oxytetracycline to have <i>potential</i> as primary treatment for BP.</li> </ul> |
| <b>(c) Assuming oxytetracycline is 20% less effective than prednisolone and the mortality rate of prednisolone is 40%:</b>                                                                                                                                                                                                          |
| <b>Results:</b>                                                                                                                                                                                                                                                                                                                     |
| <ul style="list-style-type: none"> <li>○ a maximum median mortality rate of 30% would be acceptable for oxytetracycline to have <i>any place</i> in the management of BP</li> <li>○ a maximum median mortality rate of 15% would be acceptable for oxytetracycline to have <i>potential</i> as primary treatment for BP.</li> </ul> |

**Table 2: Number of participants withdrawn from the trial and the primary reasons**

| Primary reason for withdrawal        | Doxycycline | Prednisolone | Total     |
|--------------------------------------|-------------|--------------|-----------|
| Death                                | 14          | 19           | 33*       |
| Adverse event                        | 2           | 1            | 3         |
| Lost to follow-up                    | 5           | 4            | 9         |
| Treatment failure                    | 4           | 1            | 5         |
| Withdrew consent                     | 23          | 16           | 39        |
| Unable to tolerate trial medications | 1           | 0            | 1         |
| Other                                | 1           | 1            | 2         |
| <b>Total</b>                         | <b>50</b>   | <b>42</b>    | <b>92</b> |

\*34 deaths occurred in the trial, but one participant withdrew consent before they subsequently died, hence the total withdrawn due to death is 33

**Table 3: Total number of Grade 3, 4 and 5 related adverse events: mITT analysis**

|                                                                                | Treatment           |                      |
|--------------------------------------------------------------------------------|---------------------|----------------------|
|                                                                                | Doxycycline (n=121) | Prednisolone (n=113) |
| Total number of grade 3 (severe) AEs reported (mean per participant)           | 33* (0.3)           | 59 (0.5)             |
| Total number of grade 4 (life-threatening) AEs reported (mean per participant) | 9 (0.1)             | 9 (0.1)              |
| Total number of grade 5 (death) AEs reported (mean per participant)            | 3 (<0.1)            | 11 (0.1)             |
| <b>Total number of grade 3, 4 and 5 AEs reported (mean per patient)</b>        | <b>45 (0.4)</b>     | <b>79 (0.7)</b>      |

\*includes one Suspected Unexpected Serious Adverse Reaction (hypoglycaemia)

**Table 4: The maximum grade of adverse event that each participant experienced during the trial that was considered possibly, probably or definitely related to the study drug: mITT analysis**

| The maximum grade of AE that each participant experienced during the trial that was considered possibly, probably or definitely related to study drug | Treatment                       |                                  |
|-------------------------------------------------------------------------------------------------------------------------------------------------------|---------------------------------|----------------------------------|
|                                                                                                                                                       | Starting on Doxycycline (n=121) | Starting on Prednisolone (n=113) |
|                                                                                                                                                       | n (%)                           | n (%)                            |
| Number of participants who either experienced no adverse events or whose maximum grade of AE was grade 1 (mild) or 2 (moderate)                       | 99 (81.8%)                      | 72 (63.7%)                       |
| Number of participants whose maximum grade of AE was grade 3 (severe)                                                                                 | 14 (11.6%)                      | 25 (22.1%)                       |
| Number of participants whose maximum grade of AE was grade 4 (life-threatening)                                                                       | 5 (4.1%)                        | 5 (4.4%)                         |
| Number of participants whose maximum grade of AE was grade 5 (death)                                                                                  | 3 (2.5%)                        | 11 (9.7%)                        |
| <b>Total number of participants whose maximum grade of AE was 3, 4, or 5</b>                                                                          | <b>22 (18.2%)</b>               | <b>41 (36.3%)</b>                |

**Note:** This table includes all patients who have at least 1 record of an AE assessment from the scheduled visit AE assessments, or a recorded SAE, SAR, or death. Participants count only once in this table as per their highest grade of adverse event.

**Table 5: Proportion of participants who had a further episode of BP after previously being classified as a treatment success – modified ITT analysis**

| Outcome                                                           | Treatment   |                                      |
|-------------------------------------------------------------------|-------------|--------------------------------------|
|                                                                   | Doxycycline | Prednisolone                         |
| Relapse                                                           | 37 (32.5%)  | 39 (35.8%)                           |
| No relapse                                                        | 77 (67.5%)  | 70 (64.2%)                           |
| <b>Total</b>                                                      | <b>114</b>  | <b>109</b>                           |
| <b>Difference in proportions (prednisolone minus doxycycline)</b> | Adjusted*   | <b>2.1%</b> (90% CI: -8.3% to 12.5%) |
|                                                                   | Unadjusted  | <b>3.3%</b> (90% CI: -7.1% to 13.8%) |

**Note:** All patients who have at least had one physical examination in the study, and who have been classed as having been classified as a treatment success at some point in the trial are included in this analysis. \*Estimates are from a regression model adjusted for baseline severity of BP, age, and Karnofsky score.

**Table 6: Potent and superpotent topical corticosteroid use according to study period and treatment allocation**

| Time period                       | Doxycycline (N = 112), n (%) |             |                                        | Prednisolone (N = 101), n (%) |             |                                        |
|-----------------------------------|------------------------------|-------------|----------------------------------------|-------------------------------|-------------|----------------------------------------|
|                                   | Potent                       | Superpotent | Patients using topical corticosteroids | Potent                        | Superpotent | Patients using topical corticosteroids |
| After randomisation up to 3 weeks | 6 (5.4)                      | 1 (0.9)     | 7 (6.3)                                | 3 (3.0)                       | 1 (1.0)     | 4 (4.0)                                |
| After 3 weeks up to 6 weeks       | 12 (10.7)                    | 11 (9.8)    | 23 (20.5)                              | 6 (5.9)                       | 0           | 6 (5.9)                                |
| After 6 weeks                     | 5 (4.5)                      | 7 (6.3)     | 12 (10.7)                              | 2 (2.0)                       | 0           | 2 (2.0)                                |
| At any time during the trial      | 13 (11.6)                    | 11 (9.8)    | 24 (21.4)                              | 6 (5.9)                       | 1 (1.0)     | 7 (6.9)                                |

**Table 7: Total number of related adverse events by grade: raw data**

| Adverse event              | Number of adverse events (mean per participant) |                                |
|----------------------------|-------------------------------------------------|--------------------------------|
|                            | Doxycycline ( <i>n</i> = 121)                   | Prednisolone ( <i>n</i> = 113) |
| Grade 1 (mild)             | 210 (1.7)                                       | 234 (2.1)                      |
| Grade 2 (moderate)         | 158 (1.3)                                       | 129 (1.1)                      |
| Grade 3 (severe)           | 33 (0.3)                                        | 59 (0.5)                       |
| Grade 4 (life-threatening) | 9 (0.1)                                         | 9 (0.1)                        |
| Grade 5 (death)            | 3 (<0.1)                                        | 11 (0.1)                       |
| Grades 1–5                 | 413 (3.4)                                       | 442 (3.9)                      |

**Note:** This table includes all patients who have at least one record of an adverse event assessment from the scheduled visit adverse event assessments or a recorded serious adverse event or death.

**Table 8: The maximum grade of adverse event that each participant experienced during the trial that was considered possibly, probably or definitely related to the study drug (any grade): raw data**

| Adverse event                                             | Number (%) of patients        |                                |
|-----------------------------------------------------------|-------------------------------|--------------------------------|
|                                                           | Doxycycline ( <i>N</i> = 121) | Prednisolone ( <i>N</i> = 113) |
| No adverse events                                         | 23 (19.0)                     | 13 (11.5)                      |
| Maximum grade of adverse event grade 1 (mild)             | 20 (16.5)                     | 16 (14.2)                      |
| Maximum grade of adverse event grade 2 (moderate)         | 56 (46.3)                     | 43 (38.1)                      |
| Maximum grade of adverse event grade 3 (severe)           | 14 (11.6)                     | 25 (22.1)                      |
| Maximum grade of adverse event grade 4 (life-threatening) | 5 (4.1)                       | 5 (4.4)                        |
| Maximum grade of adverse event grade 5 (death)            | 3 (2.5)                       | 11 (9.7)                       |
| Adverse event of <i>any</i> grade                         | 98 (81.0)                     | 100 (88.5)                     |

**Note:** This table includes all patients with at least one record of an adverse event assessment from the scheduled visit adverse event assessments or a recorded serious adverse event or death.

**Table 9: All-cause mortality and reasons**

| <b>Treatment allocated: Doxycycline</b> |                                                                                                                                                                                                                                            |                      |                                                                     |
|-----------------------------------------|--------------------------------------------------------------------------------------------------------------------------------------------------------------------------------------------------------------------------------------------|----------------------|---------------------------------------------------------------------|
| <b>Patient number</b>                   | <b>Cause of death</b>                                                                                                                                                                                                                      | <b>Date of death</b> | <b>Possibly, probably or definitely related to trial treatment?</b> |
| 5511                                    | Sepsis secondary to Urinary tract Infection. Admitted with 24hr history of shivering and vomiting, temp on admission 38.4c 8.3. Treated for urosepsis with iv antibiotics and iv hydration. Prognosis poor, deteriorated, died 10/10/2012. | 28/02/2012           | Related                                                             |
| 5512                                    | Chest infection. Conditions contributing to the cause of death was stroke, hypertension and Bullous Pemphigoid. Patient switched treatments.                                                                                               | 07/06/2012           | Related                                                             |
| 7101                                    | Hypertension & severe LVF                                                                                                                                                                                                                  | 05/06/2013           | Unrelated                                                           |
| 8407                                    | died in hospital - MI & IHD                                                                                                                                                                                                                | 18/06/2012           | Unknown                                                             |
| 9604                                    | Complication form pacemaker surgery. Follow-up information - medical notes now unobtainable. Will follow-up with HSCIC.                                                                                                                    | 30/07/2009           | Unknown                                                             |
| 10103                                   | 1a.sepsis ,1b. Osteomyelitis of left foot. Contributing factor Diabetese mellitus and BP                                                                                                                                                   | 06/10/2011           | Unrelated                                                           |
| 10605                                   | Pneumonia, date of death 24/03/2012                                                                                                                                                                                                        | 05/01/2012           | Unrelated                                                           |
| 12104                                   | Pulmonary embolus, acute renal failure                                                                                                                                                                                                     | 14/12/2010           | Unrelated                                                           |
| 12302                                   | 1a congestivecardiac failure, 1b ischaemic heart disease. 2. COPD, 3. Morbid obesity                                                                                                                                                       | 22/05/2009           | Unrelated                                                           |
| 12312                                   | End of life pathway instigated by GP. Progressive frailty. Exact cause of death not known                                                                                                                                                  | 19/12/2011           | Unknown                                                             |
| 12902                                   | Pneumonia also cellulitis, also had COPD. BP in remission at time of death.                                                                                                                                                                | 10/07/2012           | Related                                                             |
| 12903                                   | Severe right heart failure and mitral stenosis. Died on ITU (on IV hydrocortisone at this point and not oral pred) after a prolonged hospital stay.                                                                                        | 10/07/2012           | Unrelated                                                           |
| 13907                                   | Myocardial infarction                                                                                                                                                                                                                      | 18/08/2011           | Unrelated                                                           |
| 20101                                   | probably by cerebral infarction (oral information from GP)                                                                                                                                                                                 | 14/07/2011           | Unrelated                                                           |

**Note:** The adjudication regarding relatedness was carried out by an independent reviewer. Unknowns were classified as unrelated for the analysis.

| <b>Treatment allocated: Prednisolone</b> |                                                                                                                                                                                                                                                                                                                                                                                                                                                  |                      |                                                      |
|------------------------------------------|--------------------------------------------------------------------------------------------------------------------------------------------------------------------------------------------------------------------------------------------------------------------------------------------------------------------------------------------------------------------------------------------------------------------------------------------------|----------------------|------------------------------------------------------|
| <b>Patient number</b>                    | <b>Cause of death</b>                                                                                                                                                                                                                                                                                                                                                                                                                            | <b>Date of death</b> | <b>At least possibly related to trial treatment?</b> |
| 1604                                     | Frailty, old age and hypertension.                                                                                                                                                                                                                                                                                                                                                                                                               | 27/03/2012           | Unrelated                                            |
| 4804                                     | Site still unable to establish a cause of death - family said collapsed at home, taken to A&E and died.                                                                                                                                                                                                                                                                                                                                          | 14/04/2010           | Unrelated                                            |
| 4905                                     | 1. PCP Pneumonia, 2. Bullous Pemphigoid, 3. Immunocompromised                                                                                                                                                                                                                                                                                                                                                                                    | 15/06/2012           | Related                                              |
| 5519                                     | Chest infection and sepsis and acute kidney injury.                                                                                                                                                                                                                                                                                                                                                                                              | 19/07/2013           | Related                                              |
| 5704                                     | Cause of death unknown - died of old age in a nursing home - all that is known                                                                                                                                                                                                                                                                                                                                                                   | 06/08/2010           | Unknown                                              |
| 7608                                     | Chest infection                                                                                                                                                                                                                                                                                                                                                                                                                                  | 13/03/2013           | Related                                              |
| 8711                                     | 1. Pulmonary thrombo-embolus due to DVT, secondary to ischaemic heart disease. With contributing factor of COPD                                                                                                                                                                                                                                                                                                                                  | 14/03/2012           | Unrelated                                            |
| 8907                                     | ESBL (E-COLI) SEPSIS                                                                                                                                                                                                                                                                                                                                                                                                                             | 21/09/2011           | Related                                              |
| 9601                                     | Bowel perforation - Presented with severe dehydration and seizure and next day moved to ITU with hypertension, acute renal failure and streptococcal septicemia. Follow-up information - Patient 09601 admitted with dehydration and seizure, then he developed acute renal failure, streptococcus septicemia, then bowel obstruction. Had MRI done and it was suggestive of Demyelinating encephalitis. Then he had bowel perforation and died. | 29/05/2009           | Related                                              |
| 9607                                     | Ruptured abdominal aortic aneurysm                                                                                                                                                                                                                                                                                                                                                                                                               | 20/10/2009           | Unrelated                                            |
| 9612                                     | Sepsis cellulitis . Bp responded well to Pred. When completely withdrawn (acc to protocol) BP flared. Prednisolone 15mg od was re-introduced. Patient was on prednisolone 15mg od when cellulitis developed. Sepsis developed in spite of systemic antibiotics                                                                                                                                                                                   | 05/04/2011           | Related                                              |
| 9617                                     | Sepsis, pneumonia. BP responded well to pred. Patient developed later pneumonia and sepsis (staphylococcus aureus). Was on Vancomycin and Benzylpenicillin (past medical history of Ca Prostate, AF on warfarin, pulmonary hypertension and CVA.)                                                                                                                                                                                                | 02/03/2012           | Related                                              |
| 9619                                     | The coroner office informed me of his cause of death which is listed as Hypothermia Hypertensive disease and pneumonia.                                                                                                                                                                                                                                                                                                                          | 25/09/2012           | Unrelated                                            |
| 10603                                    | Pneumonia, bullous pemphigoid, chronic kidney disease, congestive cardiac failure, peripheral vascular disease, type 1 diabetes.                                                                                                                                                                                                                                                                                                                 | 24/03/2010           | Related                                              |
| 12103                                    | Chronic renal failure (pre-existing condition)                                                                                                                                                                                                                                                                                                                                                                                                   | 11/11/2010           | Unrelated                                            |
| 13901                                    | Death certificate notes - frailty of old age                                                                                                                                                                                                                                                                                                                                                                                                     | 03/04/2009           | Unrelated                                            |
| 15401                                    | Bronchopneumonia with preceding confusion. Comorbidities included COPD and frailty                                                                                                                                                                                                                                                                                                                                                               | 05/01/2011           | Related                                              |
| 17402                                    | 1a. DVT, 1b. DVT, 2. diabetes mellitus, also diabetic staph.aureus skin pustules and poss. Ischaemic heart disease.                                                                                                                                                                                                                                                                                                                              | 04/01/2010           | Unrelated                                            |
| 17714                                    | Pneumonia + COPD + pulmonary hypertension                                                                                                                                                                                                                                                                                                                                                                                                        | 30/04/2013           | Related                                              |
| 17803                                    | Ascending cholangitis                                                                                                                                                                                                                                                                                                                                                                                                                            | 12/08/2009           | Related                                              |

**Note:** The adjudication regarding relatedness was carried out by an independent reviewer. Unknowns were classified as unrelated for the analysis.



Figure 1: Kaplan Meier survival plot showing time to death

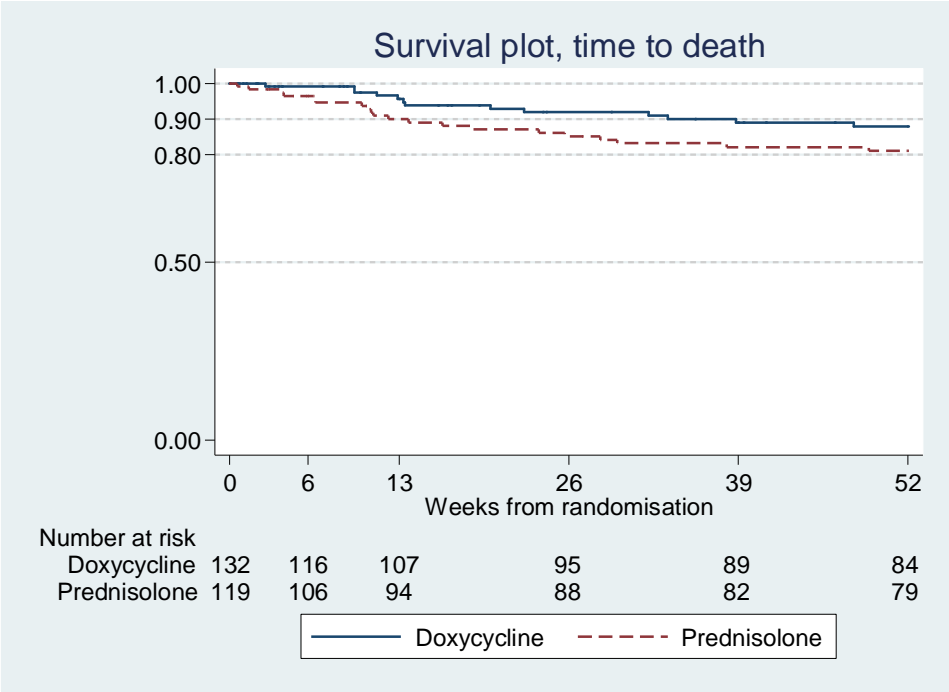

**Table 10: Difference in EQ-5D scores (raw data) – mITT analysis**

|          | Treatment                |                             |                          |                          |                             |                          |
|----------|--------------------------|-----------------------------|--------------------------|--------------------------|-----------------------------|--------------------------|
|          | Doxycycline (n=110)      |                             |                          | Prednisolone (n=101)     |                             |                          |
|          | Median (IQR)             | Median change from baseline | Total patients with data | Median (IQR)             | Median change from baseline | Total patients with data |
| Baseline | 0.656<br>(0.273 – 0.796) | 0                           | 110                      | 0.656<br>(0.273 – 0.760) | 0                           | 101                      |
| Week 6   | 0.620<br>(0.353 – 0.805) | -0.036                      | 108                      | 0.746<br>(0.587 – 1.000) | +0.090                      | 96                       |
| Week 13  | 0.710<br>(0.450 – 1.000) | +0.054                      | 96                       | 0.779<br>(0.639 – 0.925) | +0.123                      | 92                       |
| Week 26  | 0.746<br>(0.587 – 1.000) | +0.090                      | 85                       | 0.796<br>(0.638 – 0.850) | +0.140                      | 80                       |
| Week 39  | 0.727<br>(0.587 – 1.000) | +0.071                      | 79                       | 0.710<br>(0.587 – 1.000) | +0.054                      | 77                       |
| Week 52  | 0.746<br>(0.587 – 1.000) | +0.090                      | 78                       | 0.727<br>(0.587 – 1.000) | +0.071                      | 74                       |

**Table 11: Difference in DLQI scores (raw data) – mITT analysis**

|          | Treatment           |                             |                          |                      |                             |                          |
|----------|---------------------|-----------------------------|--------------------------|----------------------|-----------------------------|--------------------------|
|          | Doxycycline (n=108) |                             |                          | Prednisolone (n=101) |                             |                          |
|          | Median (IQR)        | Median change from baseline | Total patients with data | Median (IQR)         | Median change from baseline | Total patients with data |
| Baseline | 10 (6-15)           | 0                           | 108                      | 11 (6-14)            | 0                           | 101                      |
| Week 6   | 5 (2-9)             | -5                          | 106                      | 1 (0-3)              | -10                         | 96                       |
| Week 13  | 2 (1-6)             | -8                          | 98                       | 1 (0-4)              | -10                         | 90                       |
| Week 26  | 2 (0-4)             | -8                          | 86                       | 1 (0-3)              | -10                         | 80                       |
| Week 39  | 1 (0-4)             | -9                          | 80                       | 1 (1-3)              | -10                         | 77                       |
| Week 52  | 1 (0-3)             | -9                          | 79                       | 1 (0-3)              | -10                         | 75                       |

**Figure 2: Kaplan Meier survival plot showing time to change of treatment**

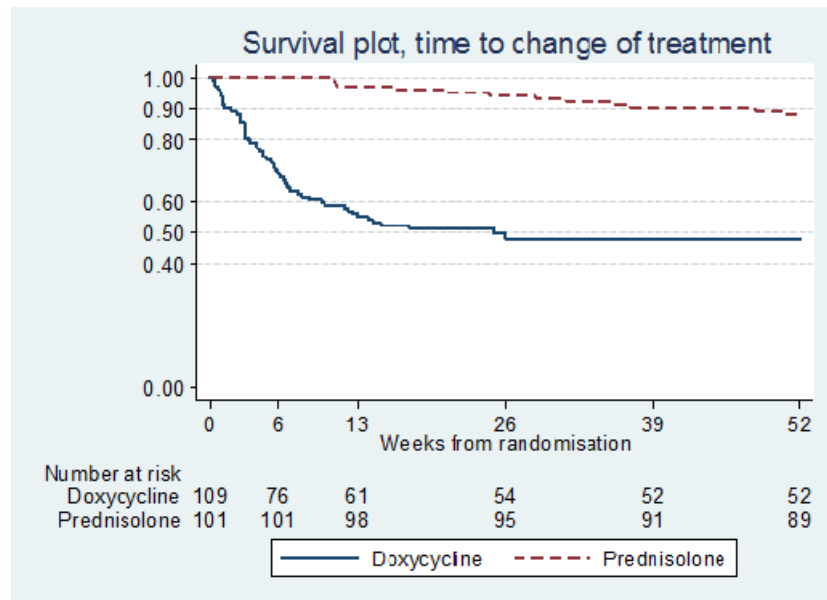

**Note:** A change in treatment refers to a change from the allocated treatment (either doxycycline or prednisolone) to the other. This graph involves the 213 patients who form the IIT population for the primary efficacy outcome

**Table 12: Action taken in response to disease relapse**

| Action taken in response to disease relapse | Treatment allocation |                     |
|---------------------------------------------|----------------------|---------------------|
|                                             | Doxycycline (n=37)   | Prednisolone (n=39) |
| Treatment changed to prednisolone           | 13 (35.1%)           | 0                   |
| Treatment changed to doxycycline            | 0                    | 0                   |
| Dose of prednisolone increased              | 16 (43.2%)           | 30 (76.9%)          |
| Dose of doxycycline increased               | 3 (8.1%)             | 0                   |
| Prednisolone restarted                      | 3 (8.1%)             | 8 (20.5%)           |
| Doxycycline restarted                       | 2 (5.4%)             | 0                   |
| Other treatment change                      | 0                    | 1 (2.6%)            |

**Note:** This table refers to changes made at the point of relapse. In some instances where a patient is allocated to a particular treatment, the action may be to increase the dose or restart the unallocated drug. This is because the patient may have already changed treatment to an unallocated treatment prior to relapse, due to prior treatment failure for example.

**Trial Steering Committee (TSC): Independent members:** Professor Jonathan Barker (Chair), Professor Pascal Joly (Clinical expert), Dr Jonathan Leonard (Clinical expert), Ms Helena Haywood (dermatology nurse).  
**Patient representatives:** Penny Standen, Brian Lockwood. **Non-independent members** Professor Hywel Williams (Chief investigator), Professor Fenella Wojnarowska (Lead clinician), Dr Gudula Kirtschig (Clinical expert & co-ordinator for European sites), Professor Andrew Nunn (Senior Trial statistician), Daniel Bratton, Sunita Rehal, Thomas Godec (Trial statisticians), Dr Karen Harman (PI representative), Dr Phillip Hampton (PI representative), Dr Joanne Chalmers (research fellow) The current trial manager was also a non-independent member of the TSC.

**Data Monitoring Committee:** Prof Sallie Lamb (Chair), Dr Robin Graham-Brown (Independent member), Dr Tracey Young

**Trial Management group:** Professor Hywel Williams (Chief investigator), Professor Fenella Wojnarowska (Lead clinician), Dr Gudula Kirtschig (Clinical expert & co-ordinator for European sites), Professor Andrew Nunn (Senior Trial statistician), Daniel Bratton, Sunita Rehal, Thomas Godec (Trial statisticians), Professor James Mason (health economist). The current trial manager was also a member of the TMG.

**Senior trial managers:** Margaret Childs, Diane Whitham; **Trial managers:** Caroline Onions, Dr Katharine Foster, Dr Anna Sandell; **Data managers, trial co-ordinators and administrators** Daniel Simpkins, Aisha Shafayat, Robert Allen, Aimee Tooley, Sally Kucyj

#### **List of recruiting sites**

UK: Aintree University Hospitals NHS Foundation Trust, Blackpool, Fylde and Wyre Hospitals NHS Foundation Trust, Bradford Teaching Hospitals NHS Foundation Trust, Brighton and Sussex University Hospitals NHS Trust, Cambridge University Hospitals NHS Trust, City Hospitals Sunderland NHS Foundation Trust, County Durham and Darlington NHS Foundation Trust, Derby Hospitals NHS Foundation Trust, The Dudley Group of Hospitals NHS Foundation, East Kent Hospitals University NHS Foundation Trust, Frimley Park Hospital NHS Foundation Trust, Guy's and St Thomas' NHS Foundation Trust, Harrogate and District NHS Foundation Trust, Hull and East Yorkshire Hospitals NHS Trust, The Ipswich Hospital NHS Trust, James Paget University Hospitals NHS Foundation Trust, Mid Staffordshire NHS Foundation Trust, Norfolk & Norwich University Hospitals NHS Trust, North Cumbria University Hospitals NHS Trust, Northern Devon Healthcare NHS Trust, Nottingham University Hospitals NHS Trust, Oxford Radcliffe Hospitals NHS Trust, South London Healthcare NHS Trust, The Royal Berkshire NHS Foundation Trust, Royal Devon & Exeter NHS Foundation Trust, Royal Liverpool and Broadgreen University Hospitals NHS Trust, Royal United Hospitals Bath NHS Trust, Sandwell and West Birmingham Hospitals NHS Trust, Sheffield Teaching Hospitals NHS Foundation Trust, Sherwood Forest Hospitals NHS Trust, South Devon Healthcare NHS Foundation Trust, South Tees Hospitals NHS Trust, South Warwickshire General Hospitals NHS Trust, St George's Healthcare NHS Trust, Great Western Hospitals NHS Foundation Trust, Somerset Community Health, Charter House, Yeovil (incorporating Bridgewater Community Hospital), Newcastle Upon Tyne Hospitals NHS Foundation Trust, Whittington Health, United Lincolnshire Hospitals NHS Trust, University Hospitals Coventry & Warwickshire NHS Trust, University Hospitals Bristol NHS Foundation Trust, University Hospitals of Leicester NHS Trust, Whipps Cross University Hospital NHS Trust, Yeovil District Hospital NHS Foundation Trust, Grampian Health Board, Gwent Healthcare NHS Trust, Hywel Dda NHS Trust, Abertawe Bro Morgannwg University NHS Trust, Cardiff and Vale NHS Trust, Tayside Health Board.

Germany: Hautklinik der Medizinische Fakultät Carl Gustav Carus, Dresden; Department of Dermatology, University Hospital of Erlangen, Erlangen; Hautklinik des Universitätsklinikums Schleswig-Holstein, Lübeck; Hautklinik der Johannes Gutenberg-Universität, Mainz; Hautklinik des Universitätsklinikums Münster, Münster; Hautklinik des Universitätsklinikums Schleswig-Holstein, Kiel; Hautklinik des Universitätsklinikums Würzburg, Würzburg
